# Supplementary material
Source: PubMed Central journal article supplement (PMC4867233)
Supplement: NIHMS778016-supplement-Supplemental_data.pdf [file NIHMS778016-supplement-Supplemental_data.pdf]

**microRNA-1343 attenuates pathways of fibrosis by targeting the TGF- $\beta$  receptors.**  
 Stolzenburg, L.R., Wachtel, S., Dang, H., & Harris, A.

| <b>TGFBR1 3'UTR</b>         |                             |                             | <b>TGFBR2 3'UTR</b>         |  |
|-----------------------------|-----------------------------|-----------------------------|-----------------------------|--|
| <b>site 1</b><br>nt 147-153 | <b>site 2</b><br>nt 164-171 | <b>site 3</b><br>nt 214-220 | <b>site 1</b><br>nt 399-406 |  |
| WT <u>CCCAGGA</u>           | WT <u>CCCAGGA</u>           | WT <u>CCCAGGA</u>           | WT <u>CCCAGGAA</u>          |  |
| MUT <u>CCG<u>C</u>GGA</u>   | MUT <u>CTT<u>A</u>AGA</u>   | MUT <u>CCG<u>T</u>CGA</u>   | MUT <u>CCG<u>C</u>GGA</u>   |  |

  

| <b>ELMO2 3'UTR</b>        |                           |                             |                             |                             |
|---------------------------|---------------------------|-----------------------------|-----------------------------|-----------------------------|
| <b>site 1</b><br>nt 24-30 | <b>site 2</b><br>nt 45-51 | <b>site 3</b><br>nt 381-388 | <b>site 4</b><br>nt 696-702 | <b>site 5</b><br>nt 866-873 |
| WT <u>CCCAGGA</u>         | WT <u>CCCAGGA</u>         | WT <u>CCCAGGA</u>           | WT <u>CCAGGAA</u>           | WT <u>CCCAGGA</u>           |
| MUT <u>CTC<u>G</u>AGA</u> | MUT <u>CCT<u>A</u>GTA</u> | MUT <u>CCG<u>C</u>GGA</u>   | MUT <u>CCT<u>A</u>GGA</u>   | MUT <u>CCG<u>C</u>GGA</u>   |

**Supplementary Figure 1: Seed sites for miR-1343 within the TGFBR1, TGFBR2, and ELMO2 3' UTRs.** WT, wild type; MUT, mutant. Underlined nucleotides denote mutated bases.

**microRNA-1343 attenuates pathways of fibrosis by targeting the TGF- $\beta$  receptors.**  
Stolzenburg, L.R., Wachtel, S., Dang, H., & Harris, A.

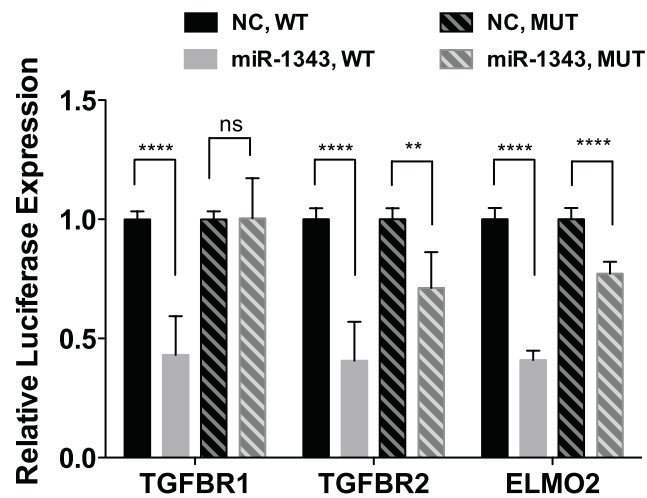

**Supplementary Figure 2: Luciferase assay of Caco2 cells transiently co-transfected with either wild type (WT) or mutant (MUT) pMIR-REPORT-3' UTR constructs, and miR-1343 or negative control (NC) miRNA. Luciferase values were normalized to pMIR- $\beta$ -galactosidase levels and illustrated relative to the NC. n = 3. \*\*  $p \leq 0.01$ , \*\*\*\*  $p \leq 0.0001$ , ns = not significant.**

**microRNA-1343 attenuates pathways of fibrosis by targeting the TGF- $\beta$  receptors.**  
Stolzenburg, L.R., Wachtel, S., Dang, H., & Harris, A.

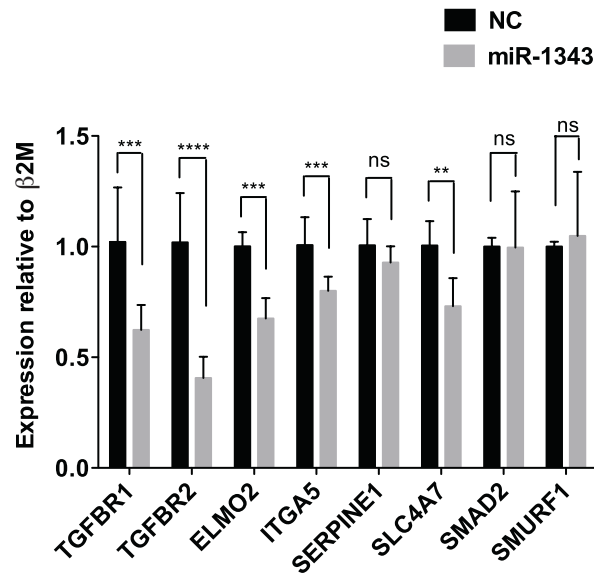

**Supplementary Figure 3: Gene expression levels in 16HBE14o- cells transiently transfected with miR-1343 or negative control (NC) miRNA.** RNA was extracted after 48 hours. RT-qPCR Ct values were normalized to beta-2-microglobulin ( $\beta$ 2M).  $n = 3$ . \*\*  $p \leq 0.01$ , \*\*\*  $p \leq 0.001$ , \*\*\*\*  $p \leq 0.0001$ , ns = not significant.

**microRNA-1343 attenuates pathways of fibrosis by targeting the TGF- $\beta$  receptors.**  
Stolzenburg, L.R., Wachtel, S., Dang, H., & Harris, A.

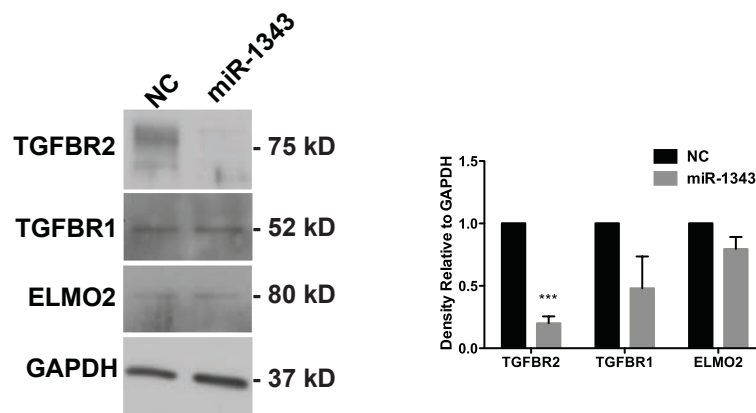

**Supplementary Figure 4: Western blots of 16HBE14o- lysates transfected with miR-1343 or NC miRNA for 48 hours and probed with antibodies specific to TGFBR1, TGFBR2 and ELMO2.** Proteins were quantified relative to GAPDH loading control and are expressed as fold change compared to NC.  $n = 3$ . \*\*\*  $p \leq 0.001$ .

**microRNA-1343 attenuates pathways of fibrosis by targeting the TGF-β receptors.**

Stolzenburg, L.R., Wachtel, S., Dang, H., & Harris, A.

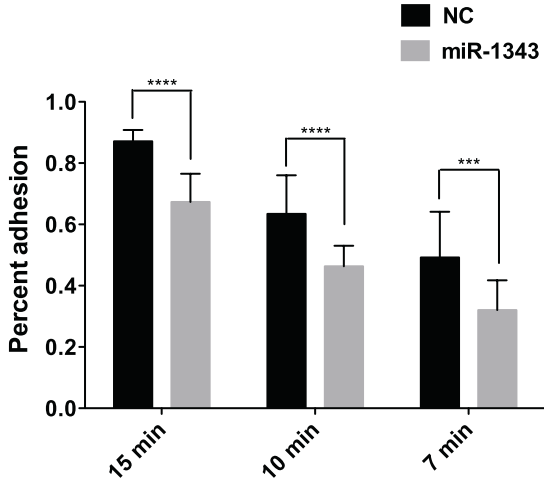

**Supplementary Figure 5: Adhesion of A549 cells transiently transfected with miR-1343 or negative control (NC) miRNA for 48 hours.** Graph shows the percent of total viable cells that adhered to the Collagen 1-coated surface. *n* = 4. \*\*\*  $p \leq 0.001$ , \*\*\*\*  $p \leq 0.0001$ .

**microRNA-1343 attenuates pathways of fibrosis by targeting the TGF- $\beta$  receptors.**

Stolzenburg, L.R., Wachtel, S., Dang, H., & Harris, A.

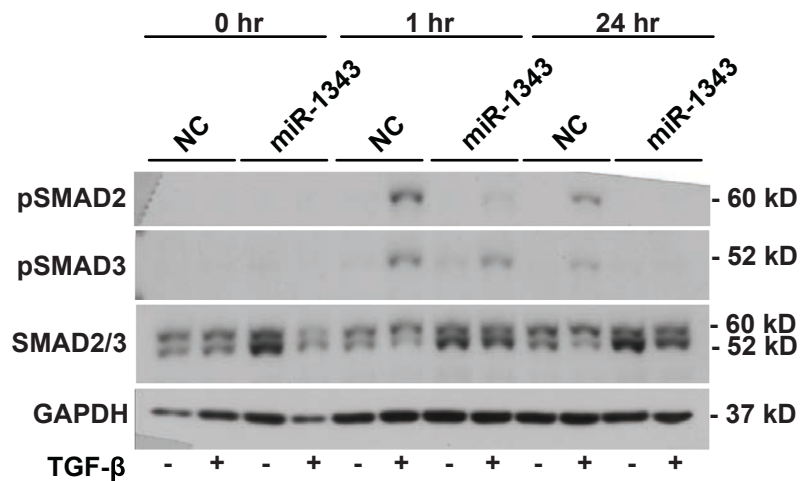

**Supplementary Figure 6: miR-1343 represses phosphorylation of SMAD2/3.**

Western blot of lysates from primary lung fibroblasts transiently transfected with miR-1343 or NC miRNA and treated with TGF- $\beta$ 1 (5 ng/mL, +) or vehicle control (-) for the indicated period of time. Blots were probed with antibodies specific for pSMAD2, phosphorylated (active) SMAD2; pSMAD3, phosphorylated (active) SMAD3; total SMAD2/3, slower migrating species is SMAD2 and faster is SMAD3. GAPDH was the loading control.

**microRNA-1343 attenuates pathways of fibrosis by targeting the TGF- $\beta$  receptors.**  
Stolzenburg, L.R., Wachtel, S., Dang, H., & Harris, A.

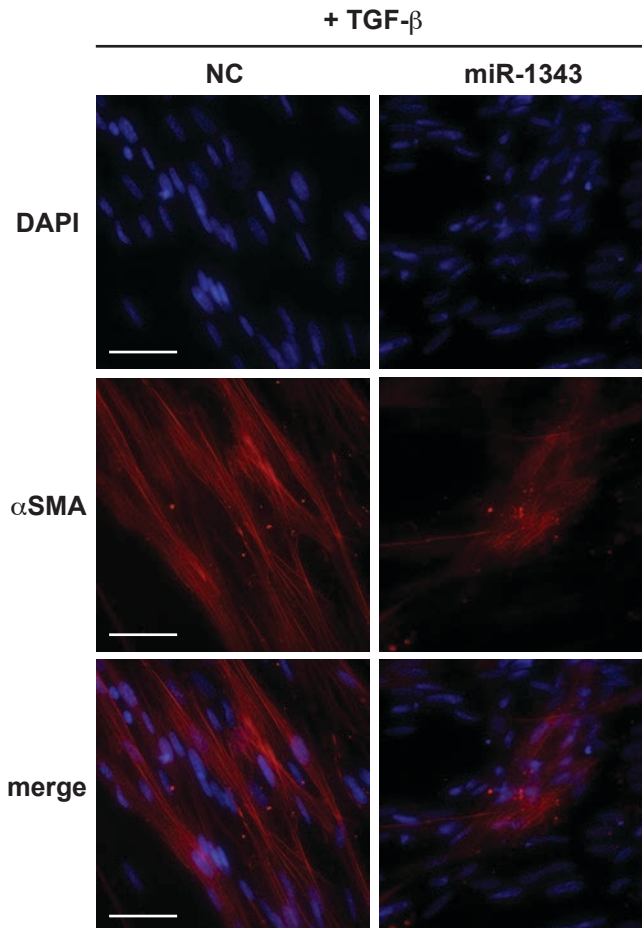

**Supplementary Figure 7: miR-1343 impairs synthesis and structural organization of  $\alpha$ SMA after TGF- $\beta$  exposure.** Representative images of immunofluorescence in primary lung fibroblasts transiently transfected with miR-1343 or negative control (NC) miRNA and treated with TGF- $\beta_1$  (5 ng/mL, +) or vehicle control (-) for 48 hours. Red fluorescence shows  $\alpha$ SMA and blue is DAPI nuclear counterstain. Merge illustrates  $\alpha$ SMA staining plus DAPI. Scale bar = 50  $\mu$ m.

**microRNA-1343 attenuates pathways of fibrosis by targeting the TGF- $\beta$  receptors.**  
Stolzenburg, L.R., Wachtel, S., Dang, H., & Harris, A.

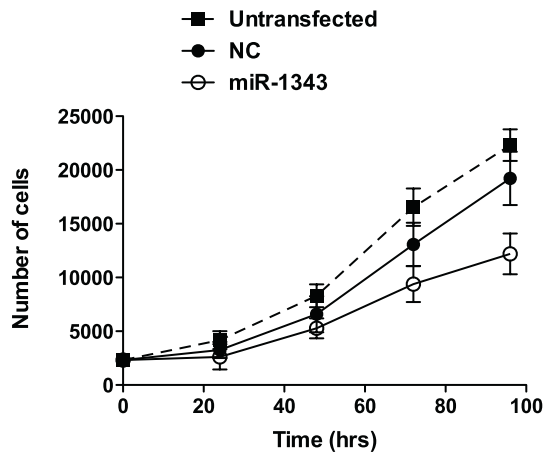

**Supplementary Figure 8: Growth curve of A549 cells transiently transfected with miR-1343 or negative control (NC) miRNA by MTS assay.** The number of transfected or untransfected cells was measured at 0, 24, 48, 72, and 96 hours post-transfection and compared to chemiluminescence measured from a standard curve to obtain cell number.  $n = 3$ .



**microRNA-1343 attenuates pathways of fibrosis by targeting the TGF- $\beta$  receptors.**  
 Stolzenburg, L.R., Wachtel, S., Dang, H., & Harris, A.

| Term                                                    | Count | PValue      |
|---------------------------------------------------------|-------|-------------|
| GO:0010975~regulation of neuron projection development  | 8     | 0.013006182 |
| GO:0016023~cytoplasmic membrane-bounded vesicle         | 31    | 0.013533317 |
| GO:0031967~organelle envelope                           | 34    | 0.013696356 |
| GO:0007265~Ras protein signal transduction              | 10    | 0.013709129 |
| GO:0051592~response to calcium ion                      | 7     | 0.014019994 |
| GO:0031975~envelope                                     | 34    | 0.014124089 |
| GO:0003779~actin binding                                | 21    | 0.014916472 |
| GO:0042127~regulation of cell proliferation             | 57    | 8.26E-07    |
| GO:0070161~anchoring junction                           | 21    | 3.16E-06    |
| GO:0016323~basolateral plasma membrane                  | 23    | 3.33E-06    |
| GO:0040008~regulation of growth                         | 31    | 6.49E-06    |
| GO:0030055~cell-substrate junction                      | 16    | 9.79E-06    |
| GO:0005912~adherens junction                            | 19    | 9.99E-06    |
| GO:0007398~ectoderm development                         | 22    | 1.08E-05    |
| GO:0005925~focal adhesion                               | 15    | 1.45E-05    |
| GO:0005924~cell-substrate adherens junction             | 15    | 2.27E-05    |
| GO:0008544~epidermis development                        | 20    | 3.82E-05    |
| GO:0043067~regulation of programmed cell death          | 52    | 7.77E-05    |
| GO:0010941~regulation of cell death                     | 52    | 8.59E-05    |
| GO:0030307~positive regulation of cell growth           | 9     | 1.10E-04    |
| GO:0031252~cell leading edge                            | 16    | 1.17E-04    |
| GO:0007010~cytoskeleton organization                    | 33    | 1.18E-04    |
| GO:0042981~regulation of apoptosis                      | 51    | 1.19E-04    |
| GO:0045927~positive regulation of growth                | 12    | 1.35E-04    |
| GO:0043066~negative regulation of apoptosis             | 28    | 2.14E-04    |
| GO:0005198~structural molecule activity                 | 42    | 2.14E-04    |
| GO:0001558~regulation of cell growth                    | 19    | 2.38E-04    |
| GO:0043069~negative regulation of programmed cell death | 28    | 2.68E-04    |
| GO:0060548~negative regulation of cell death            | 28    | 2.81E-04    |
| GO:0045793~positive regulation of cell size             | 9     | 2.90E-04    |
| GO:0008285~negative regulation of cell proliferation    | 28    | 2.94E-04    |
| GO:0019899~enzyme binding                               | 36    | 3.32E-04    |
| GO:0043627~response to estrogen stimulus                | 13    | 4.01E-04    |
| GO:0005829~cytosol                                      | 71    | 5.09E-04    |
| GO:0008284~positive regulation of cell proliferation    | 30    | 5.23E-04    |
| GO:0006928~cell motion                                  | 33    | 5.37E-04    |
| GO:0001726~ruffle                                       | 10    | 5.79E-04    |
| GO:0051270~regulation of cell motion                    | 18    | 6.42E-04    |
| hsa04510:Focal adhesion                                 | 19    | 0.001043951 |
| GO:0042470~melanosome                                   | 11    | 0.001215773 |
| GO:0048770~pigment granule                              | 11    | 0.001215773 |
| GO:0006916~anti-apoptosis                               | 18    | 0.001326436 |
| GO:0008361~regulation of cell size                      | 18    | 0.001326436 |
| GO:0015031~protein transport                            | 45    | 0.001375837 |
| GO:0030855~epithelial cell differentiation              | 14    | 0.001382116 |
| GO:0048638~regulation of developmental growth           | 8     | 0.001386303 |
| GO:0031090~organelle membrane                           | 59    | 0.001397004 |
| GO:0030529~ribonucleoprotein complex                    | 33    | 0.001573656 |
| GO:0045184~establishment of protein localization        | 45    | 0.001691898 |
| GO:0009898~internal side of plasma membrane             | 23    | 0.002127484 |
| GO:0008092~cytoskeletal protein binding                 | 32    | 0.002726437 |
| hsa05200:Pathways in cancer                             | 25    | 0.002761542 |
| GO:0051272~positive regulation of cell motion           | 11    | 0.002824672 |
| GO:0008104~protein localization                         | 49    | 0.00289929  |
| GO:0010035~response to inorganic substance              | 17    | 0.003190437 |
| GO:0030334~regulation of cell migration                 | 15    | 0.003310487 |
| GO:0030036~actin cytoskeleton organization              | 18    | 0.003537271 |
| GO:0050678~regulation of epithelial cell proliferation  | 9     | 0.003972315 |
| GO:0042060~wound healing                                | 16    | 0.003994533 |
| GO:0048514~blood vessel morphogenesis                   | 17    | 0.004231839 |
| GO:0050770~regulation of axonogenesis                   | 8     | 0.004276551 |
| GO:0001944~vasculature development                      | 19    | 0.004509444 |
| GO:0031410~cytoplasmic vesicle                          | 37    | 0.00467457  |
| GO:0031344~regulation of cell projection organization   | 10    | 0.004796092 |
| hsa04810:Regulation of actin cytoskeleton               | 18    | 0.005386875 |
| hsa04115:p53 signaling pathway                          | 9     | 0.005452674 |
| GO:0016477~cell migration                               | 20    | 0.005554153 |

**Supplementary Table 1: DAVID gene ontology analysis of genes down-regulated by miR-1343 compared to negative control (NC) in A549 and 16HBE14o- cells by RNA-seq.**

| Term                                                              | Count | PValue      |
|-------------------------------------------------------------------|-------|-------------|
| GO:0051130~positive regulation of cellular component organization | 15    | 0.006076785 |
| hsa05222:Small cell lung cancer                                   | 10    | 0.006107615 |
| GO:0055024~regulation of cardiac muscle tissue development        | 4     | 0.006234879 |
| GO:0060043~regulation of cardiac muscle cell proliferation        | 4     | 0.006234879 |
| GO:0055021~regulation of cardiac muscle growth                    | 4     | 0.006234879 |
| GO:0005604~basement membrane                                      | 9     | 0.006424346 |
| GO:0031346~positive regulation of cell projection organization    | 7     | 0.006608186 |
| GO:0030029~actin filament-based process                           | 18    | 0.006678629 |
| GO:0004721~phosphoprotein phosphatase activity                    | 14    | 0.006870441 |
| GO:0000165~MAPKKK cascade                                         | 15    | 0.006998967 |
| GO:0032268~regulation of cellular protein metabolic process       | 29    | 0.007426734 |
| GO:0009725~response to hormone stimulus                           | 24    | 0.007503306 |
| GO:0005739~mitochondrion                                          | 55    | 0.007542903 |
| GO:0009628~response to abiotic stimulus                           | 24    | 0.007746737 |
| GO:0001568~blood vessel development                               | 18    | 0.007808243 |
| GO:0051674~localization of cell                                   | 21    | 0.008082914 |
| GO:0048870~cell motility                                          | 21    | 0.008082914 |
| GO:0060420~regulation of heart growth                             | 4     | 0.008092409 |
| GO:0042327~positive regulation of phosphorylation                 | 10    | 0.00838081  |
| GO:0031982~vesicle                                                | 37    | 0.008737037 |
| GO:0030193~regulation of blood coagulation                        | 6     | 0.009033893 |
| GO:0004857~enzyme inhibitor activity                              | 19    | 0.009308243 |
| GO:0032535~regulation of cellular component size                  | 19    | 0.00972667  |

Supplementary Table 1 (continued)

**microRNA-1343 attenuates pathways of fibrosis by targeting the TGF- $\beta$  receptors.**  
 Stolzenburg, L.R., Wachtel, S., Dang, H., & Harris, A.

| Term                                                                                     | Count | PValue      |
|------------------------------------------------------------------------------------------|-------|-------------|
| GO:0006695~cholesterol biosynthetic process                                              | 7     | 9.04E-06    |
| GO:0008202~steroid metabolic process                                                     | 16    | 1.10E-05    |
| GO:0006694~steroid biosynthetic process                                                  | 10    | 4.29E-05    |
| GO:0005768~endosome                                                                      | 19    | 5.04E-05    |
| GO:0016126~sterol biosynthetic process                                                   | 7     | 5.49E-05    |
| GO:0008610~lipid biosynthetic process                                                    | 18    | 2.26E-04    |
| GO:0008203~cholesterol metabolic process                                                 | 9     | 4.50E-04    |
| hsa00100: Steroid biosynthesis                                                           | 5     | 5.36E-04    |
| GO:0016125~sterol metabolic process                                                      | 9     | 8.39E-04    |
| GO:0005783~endoplasmic reticulum                                                         | 34    | 0.001135676 |
| GO:0007242~intracellular signaling cascade                                               | 41    | 0.001534451 |
| GO:0045638~negative regulation of myeloid cell differentiation                           | 5     | 0.00267773  |
| GO:0031090~organelle membrane                                                            | 36    | 0.002800942 |
| GO:0007264~small GTPase mediated signal transduction                                     | 15    | 0.002905681 |
| GO:0012505~endomembrane system                                                           | 28    | 0.00304096  |
| GO:0005525~GTP binding                                                                   | 17    | 0.0037091   |
| GO:0003924~GTPase activity                                                               | 12    | 0.003732648 |
| GO:0017157~regulation of exocytosis                                                      | 5     | 0.00426155  |
| GO:0019001~guanyl nucleotide binding                                                     | 17    | 0.004743403 |
| GO:0032561~guanyl ribonucleotide binding                                                 | 17    | 0.004743403 |
| GO:0032583~regulation of gene-specific transcription                                     | 9     | 0.004979513 |
| GO:0010008~endosome membrane                                                             | 6     | 0.005116388 |
| GO:0044440~endosomal part                                                                | 6     | 0.005116388 |
| GO:0010552~positive regulation of specific transcription from RNA polymerase II promoter | 6     | 0.005151719 |
| GO:0002020~protease binding                                                              | 4     | 0.006197341 |
| GO:0043193~positive regulation of gene-specific transcription                            | 7     | 0.007309418 |
| GO:0045080~positive regulation of chemokine biosynthetic process                         | 3     | 0.00757814  |
| hsa00650: Butanoate metabolism                                                           | 5     | 0.007689035 |
| GO:0008104~protein localization                                                          | 29    | 0.008269662 |
| GO:0017076~purine nucleotide binding                                                     | 54    | 0.009546325 |
| GO:0001817~regulation of cytokine production                                             | 10    | 0.009611422 |
| GO:0044459~plasma membrane part                                                          | 59    | 0.009882343 |

**Supplementary Table 2: DAVID gene ontology analysis of genes up-regulated by miR-1343 compared to negative control (NC) in A549 and 16HBE14o- cells by RNA-seq.**

**microRNA-1343 attenuates pathways of fibrosis by targeting the TGF- $\beta$  receptors.**  
 Stolzenburg, L.R., Wachtel, S., Dang, H., & Harris, A.

| a.            |                                        | c.         |                               |
|---------------|----------------------------------------|------------|-------------------------------|
| Cloned Region | Primers                                | Gene       | Primers                       |
| TGFB1 3' UTR  | F: 5'-GGACTAGTTTCTACAGCTTTCGCTGAACTCTC | TGFB1      | F: 5'-CGGGGAGAAGAAGTTGCTGT    |
|               | R: 5'-CGACGCGTCTTCGCCTTCTAGAAAA        |            | R: 5'-CACCAACCAGAGCTGAGTCC    |
| TGFB2 3' UTR  | F: 5'-CTGCCCTGAACTGATGCTT              | TGFB2      | F: 5'-AATAGGACTGCCATCCACTG    |
|               | R: 5'-GGTCCAGGTAGGCAGTGGAA             |            | R: 5'-TCTCACAGATGGAGGTGATGC   |
| ELMO2 3' UTR  | F: 5'-CCTGGAGCCAGAAACGAC               | ELMO2      | F: 5'-GGGACATGGTTTCAATCACC    |
|               | R: 5'-CATGGTTACTGACAGGAAGC             |            | R: 5'-TCTGGTACAGACTCTGGCTG    |
| SMAD2 3' UTR  | F1: 5'-ACTAGTGCATTGATACTGCTGGCACC      | ITGA5      | F: 5'-TTACGGCTATGTCACCATCCTT  |
|               | R1: 5'-GAGCTCGCACAAAGTCTGGAAGCAAGC     |            | R: 5'-CCCCACCAGCAAGTCATCCA    |
|               | F2: 5'-ACTAGTTCTGTTGCCAACCTGGAG        | SERPINE1   | F: 5'-CCTCTCCACAATCAGACGGC    |
|               | R2: 5'-GAGCTCGAGATCACCTGTGGGTCAAGG     |            | R: 5'-CTCTTTTTCATAAGGGGCAGCA  |
| SMURF1 3' UTR | F1: 5'-CCTAGGGCAACCAAGGCAACAGAGTC      | SLC4A7     | F: 5'-ATCTTGGCAAACTAGCTCAACT  |
|               | R1: 5'-GGCGCGCCACATAGGAACATTGGCCTGC    |            | R: 5'-CGACTCTCTTTACTAAACGGGAC |
|               | F2: 5'-CCTAGGCTTGTGCATCGTTGTGTG        | SMAD2      | F: 5'-CGACACACCGAGATCCTAACA   |
|               | R2: 5'-GGCGCGCCCTGCTGCCTACACTTCCTT     |            | R: 5'-ATATCCAGGAGGTGGCGTTT    |
|               |                                        | SMURF1     | F: 5'-TACCAGCGTTTGATCTATGC    |
|               |                                        |            | R: 5'-GCCGGTTCCTATTCTGTCTCG   |
|               |                                        | $\beta$ 2M | F: 5'-CTCTCTCTTTCTGGCCTGGAG   |
|               |                                        |            | R: 5'-TCTGCTGGATGACGTGAGTA    |

  

| b.             |                                                                                |
|----------------|--------------------------------------------------------------------------------|
| Mutated Region | Primers                                                                        |
| TGFB1 3' UTR   | miR-1343 site 1: 5'-GTAATAAAGTCAATTA AAAACTCCGCGGATTCTTTGGACCCAGGAAACAG        |
|                | miR-1343 site 2: 5'-TCCGCGGATTTCTTTGGACTTAAGAAACAGCCATGTGGGTCC                 |
|                | miR-1343 site 3: 5'-GCACTATGAACGCTTCTTTCCGTCGACAGAAAATGTGTAGTCTAC              |
| TGFB2 3' UTR   | miR-1343 site: 5'-GAGTTCTCCAATAAAAACCAATTTCCGCGGAATATTTGATGTTTTCCCTTGT         |
| ELMO2 3' UTR   | miR-1343 site 1: 5'-GAAGGGAAGGCCAACTTCTCGAGGTCTGGAAGGCCAAAGG                   |
|                | miR-1343 site 2: 5'-GGTTTTCCCTGCAGCGTACTAGTGACTTAAGAGGGCAGGA                   |
|                | miR-1343 site 3: 5'-CAGGCAGCCTTTCCGCGGCCAGCTGTTGCT                             |
|                | miR-1343 site 4/5: 5'-AGAATGTAAGTGTTCGCCTAGGCCAAAATCCCTTCTCCGCGGTACCGTCTTTCTGG |

**Supplementary Table 3: Primers used for (a) cloning of 3' UTRs, (b) mutagenesis of miR-1343 seed sequences within cloned 3' UTRs, and (c) SYBR Green qPCR assays.**
